# Supplementary material for: Polyphenol-Rich Extracts from Toona sinensis Bark and Fruit Ameliorate Free Fatty Acid-Induced Lipogenesis through AMPK and LC3 Pathways
Source: MDPI journal article supplement (doi:10.3390/jcm8101664), 2019-10-11
Supplement: s1 [file s1]

## CERTIFICATE OF EDITING

This is to certify that the paper titled Polyphenol-rich extracts from Toona sinensis bark and fruit ameliorate free fatty acid-induced lipogenesis through AMPK and LC3 pathways commissioned to us by Yung-Chia Chen (高醫大) has been edited for English language, grammar, punctuation, and spelling by Enago, the editing brand of Crimson Interactive Consulting Co. Ltd. under Normal Editing.

✓ **ISO 17100:2015**  
Translation Service  
Providers

✓ **ISO 27001:2013**  
Information Security  
Management System

✓ **ISO 9001:2015**  
Quality Management  
System

Issued by:  
  
Enago, Crimson Interactive Inc.  
160, Greentree Dr, Ste 101 street,  
Dover City, Kent, Delaware, 19904  
Phone: +1-877-712-2177

**Disclaimer:** The author is free to accept or reject our changes in the document after our editing. However, we do not bear responsibility for revisions made to the document after our edit on 26 Sep 2019.

**Japan** www.enago.jp, www.ulatus.jp, www.voxtab.jp  
**Taiwan** www.enago.tw, www.ulatus.tw  
**China** www.enago.cn, www.ulatus.cn  
**Brazil** www.enago.com.br, www.ulatus.com.br  
**Germany** www.enago.de

**Russia** www.enago.ru  
**Arabic** www.enago.ae  
**Turkey** www.enago.com.tr  
**S. Korea** www.enago.co.kr  
**Global** www.enago.com, www.ulatus.com, www.voxtab.com

### About Crimson:

Crimson Interactive INC is one of the world's leading academic research support services. Since 2005, we've supported over 2 million researchers in 125 countries with their publication goals.

## Supplementary table 1

### Total phenols content

|     | mg/g gallic acid equivalent |
|-----|-----------------------------|
| TSB | $42.037 \pm 1.1315$         |
| TSF | $44.012 \pm 0.523$          |

Data expressed as mean  $\pm$  S.D. of three samples in triplicates analysed separately.
